# Supplementary material for: Design and construction of six metal–organic frameworks with 2-p-methoxyphenyl-1H-imidazole-4,5-dicarboxylate
Source: Royal Society of Chemistry journal article supplement (doi:10.1039/c2ce25081k), 2012-01-01
Supplement: c2ce25081k.pdf [file c2ce25081k.pdf]

## Design and construction of six metal-organic frameworks with 2-*p*-methoxyphenyl-1*H*-imidazole-4,5-dicarboxylate

Xinjiang Cao, Jun Zhang, Chengjie Wang, Yanyan Zhu, Gang Li\*

### Supporting Information

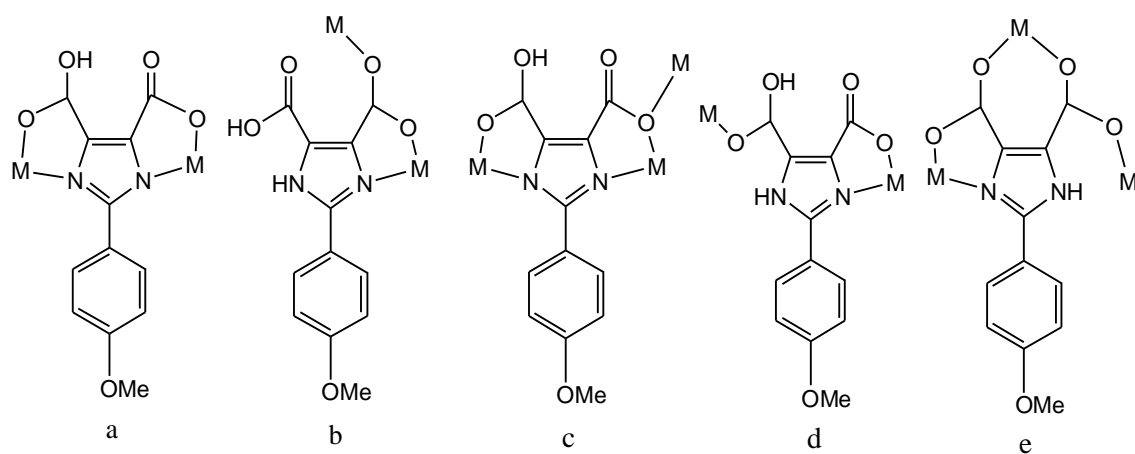

**Scheme S1.** Coordination modes of  $H_{3-n}MOPhIDC^{n-}$  anions ( $n = 1$  or  $2$ )

**Table S1.** Selected Bond Angles (deg) for Polymers **1 – 6**

| <b>1<sup>a</sup></b> |            |                     |            |
|----------------------|------------|---------------------|------------|
| N(2)#1-Cu(1)-N(1)    | 172.5(2)   | N(2)#1-Cu(1)-O(4)#1 | 83.96(14)  |
| N(1)-Cu(1)-O(4)#1    | 89.15(15)  | N(2)#1-Cu(1)-O(6)   | 96.99(16)  |
| N(1)-Cu(1)-O(6)      | 90.51(17)  | O(4)#1-Cu(1)-O(6)   | 149.73(13) |
| N(2)#1-Cu(1)-O(1)    | 100.22(13) | N(1)-Cu(1)-O(1)     | 79.57(13)  |
| O(4)#1-Cu(1)-O(1)    | 112.62(12) | O(6)-Cu(1)-O(1)     | 97.05(13)  |
| <b>2<sup>b</sup></b> |            |                     |            |
| N(2)-Zn(1)-N(4)      | 98.35(11)  | N(2)-Zn(1)-N(3)     | 103.14(12) |
| N(4)-Zn(1)-N(3)      | 76.61(12)  | N(2)-Zn(1)-N(1)#1   | 165.69(12) |
| N(4)-Zn(1)-N(1)#1    | 94.07(11)  | N(3)-Zn(1)-N(1)#1   | 86.60(12)  |
| N(2)-Zn(1)-O(1)      | 79.07(10)  | N(4)-Zn(1)-O(1)     | 100.17(11) |
| N(3)-Zn(1)-O(1)      | 176.27(11) | N(1)#1-Zn(1)-O(1)   | 91.79(11)  |
| N(2)-Zn(1)-O(4)#1    | 91.22(11)  | N(4)-Zn(1)-O(4)#1   | 166.40(11) |
| N(3)-Zn(1)-O(4)#1    | 91.87(12)  | N(1)#1-Zn(1)-O(4)#1 | 77.84(10)  |
| O(1)-Zn(1)-O(4)#1    | 91.08(11)  |                     |            |
| <b>3<sup>c</sup></b> |            |                     |            |
| N(4)-Co(1)-N(2)      | 95.71(7)   | N(4)-Co(1)-N(3)     | 76.88(7)   |
| N(2)-Co(1)-N(3)      | 102.66(7)  | N(4)-Co(1)-N(1)#1   | 94.22(7)   |
| N(2)-Co(1)-N(1)#1    | 168.21(7)  | N(3)-Co(1)-N(1)#1   | 85.78(7)   |
| N(4)-Co(1)-O(1)      | 100.42(7)  | N(2)-Co(1)-O(1)     | 79.29(6)   |
| N(3)-Co(1)-O(1)      | 176.76(6)  | N(1)#1-Co(1)-O(1)   | 92.68(7)   |
| N(4)-Co(1)-O(4)#1    | 168.85(7)  | N(2)-Co(1)-O(4)#1   | 92.01(6)   |
| N(3)-Co(1)-O(4)#1    | 93.59(7)   | N(1)#1-Co(1)-O(4)#1 | 79.12(6)   |
| O(1)-Co(1)-O(4)#1    | 88.91(6)   |                     |            |
| <b>4<sup>d</sup></b> |            |                     |            |
| N(1)-Co(1)-N(4)      | 96.64(7)   | N(1)-Co(1)-N(2)#1   | 167.34(6)  |

|                     |           |                   |           |
|---------------------|-----------|-------------------|-----------|
| N(4)-Co(1)-N(2)#1   | 95.46(6)  | N(1)-Co(1)-O(1)   | 79.84(6)  |
| N(4)-Co(1)-O(1)     | 98.12(6)  | N(2)#1-Co(1)-O(1) | 94.79(6)  |
| N(1)-Co(1)-N(3)     | 102.71(6) | N(4)-Co(1)-N(3)   | 77.90(7)  |
| N(2)#1-Co(1)-N(3)   | 83.45(6)  | O(1)-Co(1)-N(3)   | 175.43(6) |
| N(1)-Co(1)-O(4)#1   | 89.50(6)  | N(4)-Co(1)-O(4)#1 | 169.99(6) |
| N(2)#1-Co(1)-O(4)#1 | 79.06(6)  | O(1)-Co(1)-O(4)#1 | 90.73(6)  |
| N(3)-Co(1)-O(4)#1   | 93.06(6)  |                   |           |

**5<sup>e</sup>**

|                     |           |                     |           |
|---------------------|-----------|---------------------|-----------|
| N(3)-Cd(1)-N(3)#1   | 180.00    | N(3)-Cd(1)-O(6)     | 73.78(7)  |
| N(3)#1-Cd(1)-O(6)   | 106.22(7) | N(3)-Cd(1)-O(6)#1   | 106.22(7) |
| N(3)#1-Cd(1)-O(6)#1 | 73.78(7)  | O(6)-Cd(1)-O(6)#1   | 180.00    |
| N(3)-Cd(1)-O(1)#1   | 89.34(7)  | N(3)#1-Cd(1)-O(1)#1 | 90.66(7)  |
| O(6)-Cd(1)-O(1)#1   | 98.97(7)  | O(6)#1-Cd(1)-O(1)#1 | 81.03(7)  |
| N(3)-Cd(1)-O(1)     | 90.66(7)  | N(3)#1-Cd(1)-O(1)   | 89.34(7)  |
| O(6)-Cd(1)-O(1)     | 81.03(7)  | O(6)#1-Cd(1)-O(1)   | 98.97(7)  |
| O(1)#1-Cd(1)-O(1)   | 180.00    | N(4)#2-Cd(2)-N(1)#3 | 112.07(8) |
| N(4)#2-Cd(2)-O(9)   | 145.39(7) | N(1)#3-Cd(2)-O(9)   | 102.30(7) |
| N(4)#2-Cd(2)-O(2)#3 | 109.00(7) | N(1)#3-Cd(2)-O(2)#3 | 73.69(7)  |
| O(9)-Cd(2)-O(2)#3   | 83.95(7)  | N(4)#2-Cd(2)-O(11)  | 93.75(8)  |
| N(1)#3-Cd(2)-O(11)  | 89.05(8)  | O(9)-Cd(2)-O(11)    | 82.56(9)  |
| O(2)#3-Cd(2)-O(11)  | 155.25(7) | N(4)#2-Cd(2)-O(9)#2 | 71.71(7)  |
| N(1)#3-Cd(2)-O(9)#2 | 168.05(8) | O(9)-Cd(2)-O(9)#2   | 73.80(7)  |
| O(2)#3-Cd(2)-O(9)#2 | 116.48(7) | O(11)-Cd(2)-O(9)#2  | 79.29(8)  |

**6<sup>f</sup>**

|                   |           |                   |           |
|-------------------|-----------|-------------------|-----------|
| O(3)-Co(1)-O(1)   | 91.60(8)  | O(3)-Co(1)-O(4)#1 | 92.35(8)  |
| O(1)-Co(1)-O(4)#1 | 85.22(7)  | O(3)-Co(1)-N(5)   | 88.74(9)  |
| O(1)-Co(1)-N(5)   | 90.89(9)  | O(4)#1-Co(1)-N(5) | 175.98(8) |
| O(3)-Co(1)-O(5)   | 176.49(7) | O(1)-Co(1)-O(5)   | 90.81(8)  |
| O(4)#1-Co(1)-O(5) | 90.40(8)  | N(5)-Co(1)-O(5)   | 88.66(9)  |

|                     |           |                     |           |
|---------------------|-----------|---------------------|-----------|
| O(3)-Co(1)-N(1)#1   | 90.27(9)  | O(1)-Co(1)-N(1)#1   | 162.19(8) |
| O(4)#1-Co(1)-N(1)#1 | 77.01(8)  | N(5)-Co(1)-N(1)#1   | 106.86(9) |
| O(5)-Co(1)-N(1)#1   | 88.22(9)  | O(2)-Co(2)-O(2)#2   | 180.00    |
| O(2)-Co(2)-N(4)#3   | 90.32(8)  | O(2)#2-Co(2)-N(4)#3 | 89.68(8)  |
| O(2)-Co(2)-N(4)#4   | 89.68(8)  | O(2)#2-Co(2)-N(4)#4 | 90.32(8)  |
| N(4)#3-Co(2)-N(4)#4 | 180.00    | O(2)-Co(2)-O(8)#3   | 90.89(8)  |
| O(2)#2-Co(2)-O(8)#3 | 89.11(8)  | N(4)#3-Co(2)-O(8)#3 | 78.05(8)  |
| N(4)#4-Co(2)-O(8)#3 | 101.95(8) | O(2)-Co(2)-O(8)#4   | 89.11(8)  |
| O(2)#2-Co(2)-O(8)#4 | 90.89(8)  | N(4)#3-Co(2)-O(8)#4 | 101.95(8) |
| N(4)#4-Co(2)-O(8)#4 | 78.05(8)  | O(8)#3-Co(2)-O(8)#4 | 180.000   |

Symmetry transformations used to generate equivalent atoms: <sup>a</sup> #1: x, -y+1, z-1/2. <sup>b</sup> #1: -x+1/2, y+1/2, z. <sup>c</sup> #1: -x+1/2, y-1/2, z. <sup>d</sup> #1 : x, -y+3/2, z-1/2. <sup>e</sup> #1: -x+1, -y+2, -z+1; #2: -x+2, -y+1, -z+1; #3: x+1, y, z. <sup>f</sup> #1: -x+1/2, y-1/2, -z+1/2; #2: -x+1, -y+1, -z+1; #3: -x+1, -y, -z+1; #4: x, y+1, z.

(a)

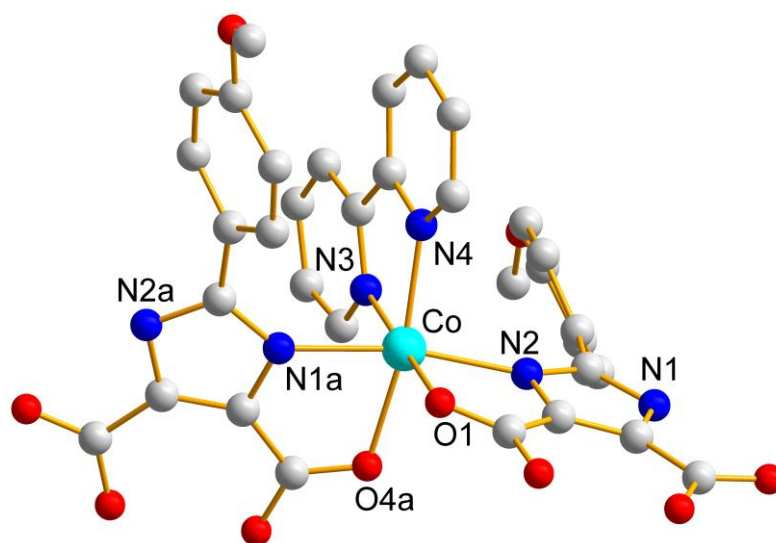

(b)

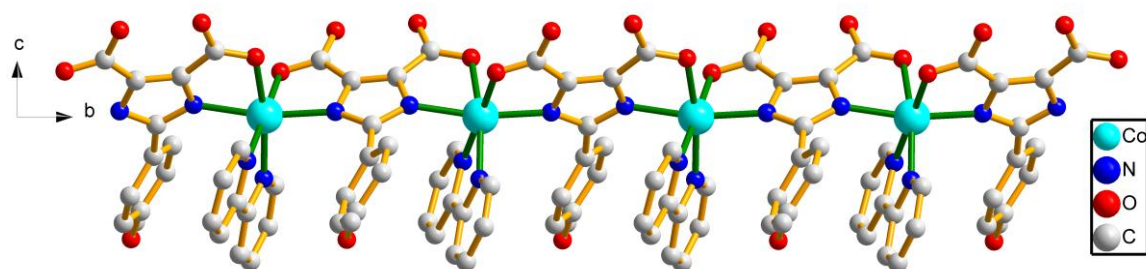

(c)

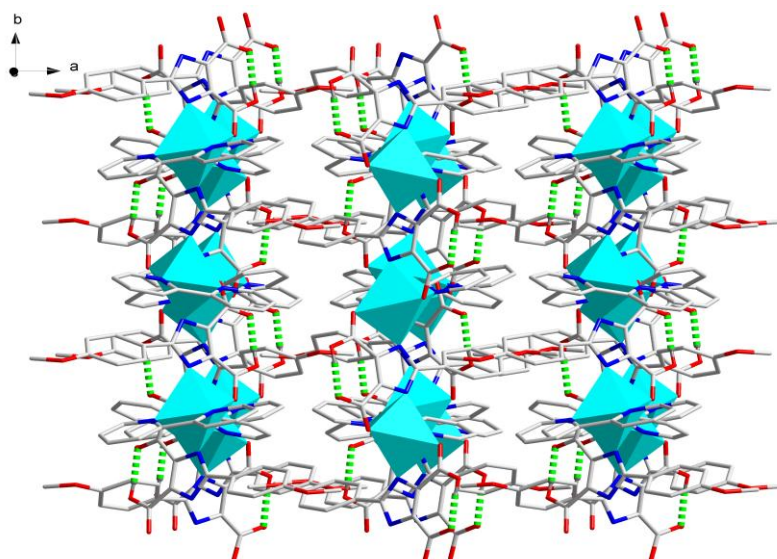

**Figure S1.** (a) Coordination arrangements of the Co(II) in polymer **3** (H atoms omitted for clarity). (b) View of the 1-D chain supported by Co(II) ions and  $\mu_2$ -HMOPhIDC<sup>2-</sup> ligands. (c) View of the 3-D supramolecular framework of polymer **3**.

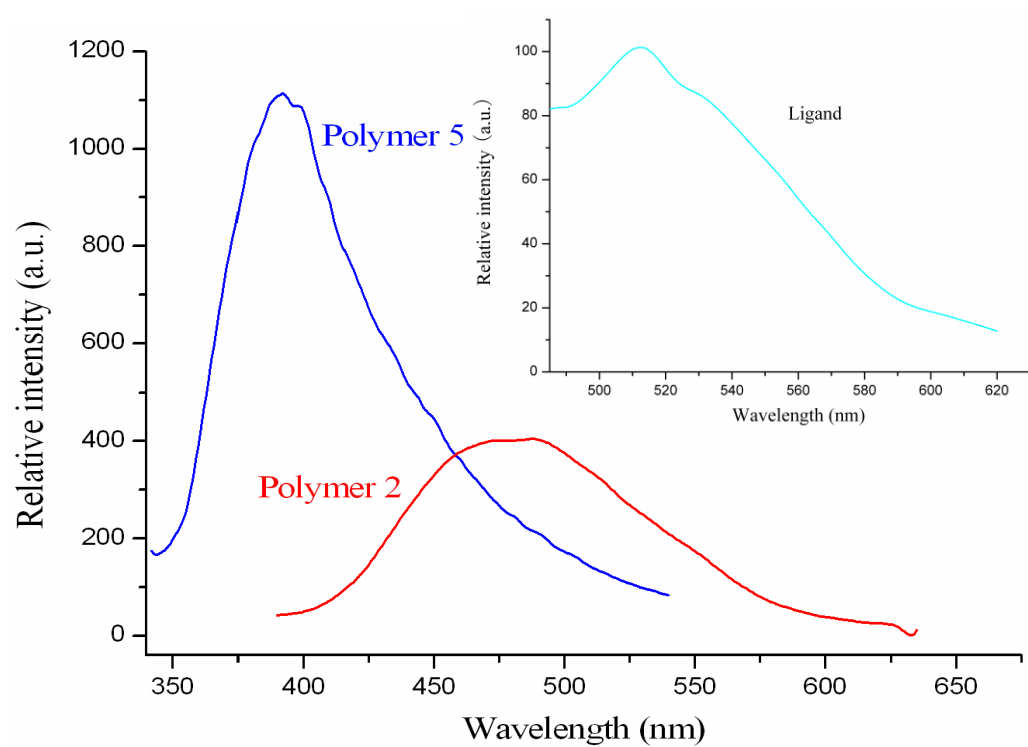

**Figure S2.** The solid-state photoluminescent spectra of the free H<sub>3</sub>MOPhIDC ligand (cyan), polymers **2** (red) and **5** (blue) at room temperature.
